# Supplementary material for: Long-Term Dietary Taurine Lowers Plasma Levels of Cholesterol and Bile Acids
Source: MDPI journal article supplement (doi:10.3390/ijms23031793), 2022-02-04
Supplement: s1 [file s1]

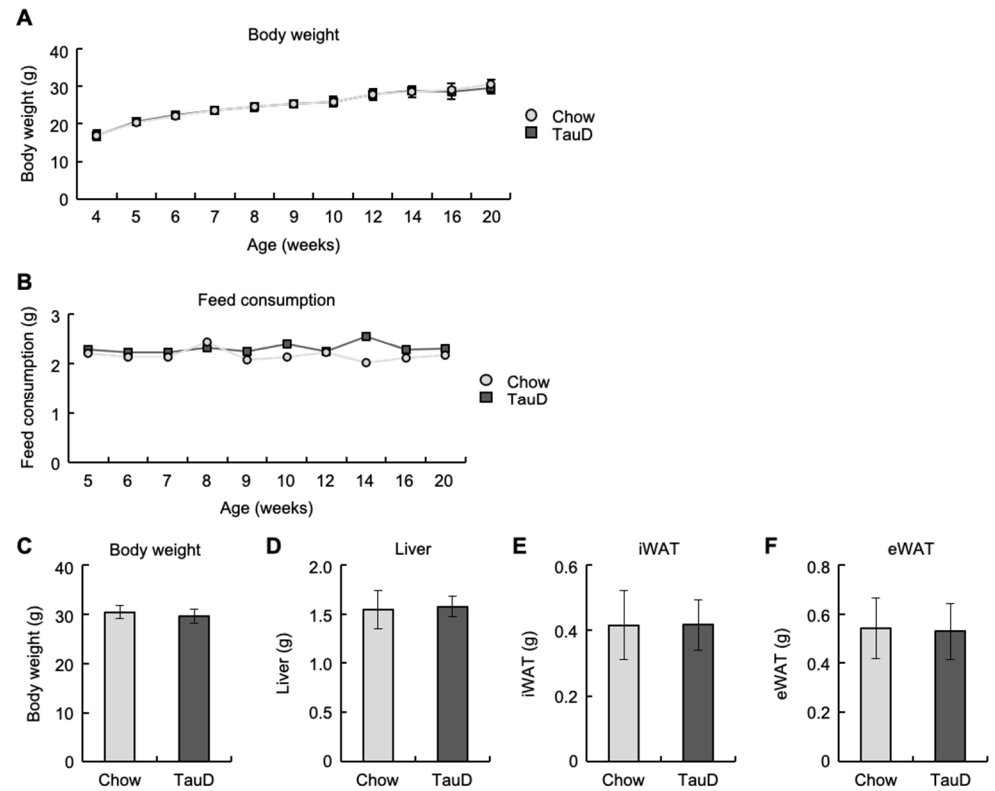

**Figure S1.** Basic data of Chow and TauD groups. (A, B) The time courses of body weight (A) and feed consumption (B) (n = 10–11). (C–F) The weights of body (C), liver (D), inguinal subcutaneous white adipose tissue (iWAT) (E), and epididymal white adipose tissue (eWAT) (F) at 20 weeks of age (n = 10–11). Values represent means  $\pm$  SD.

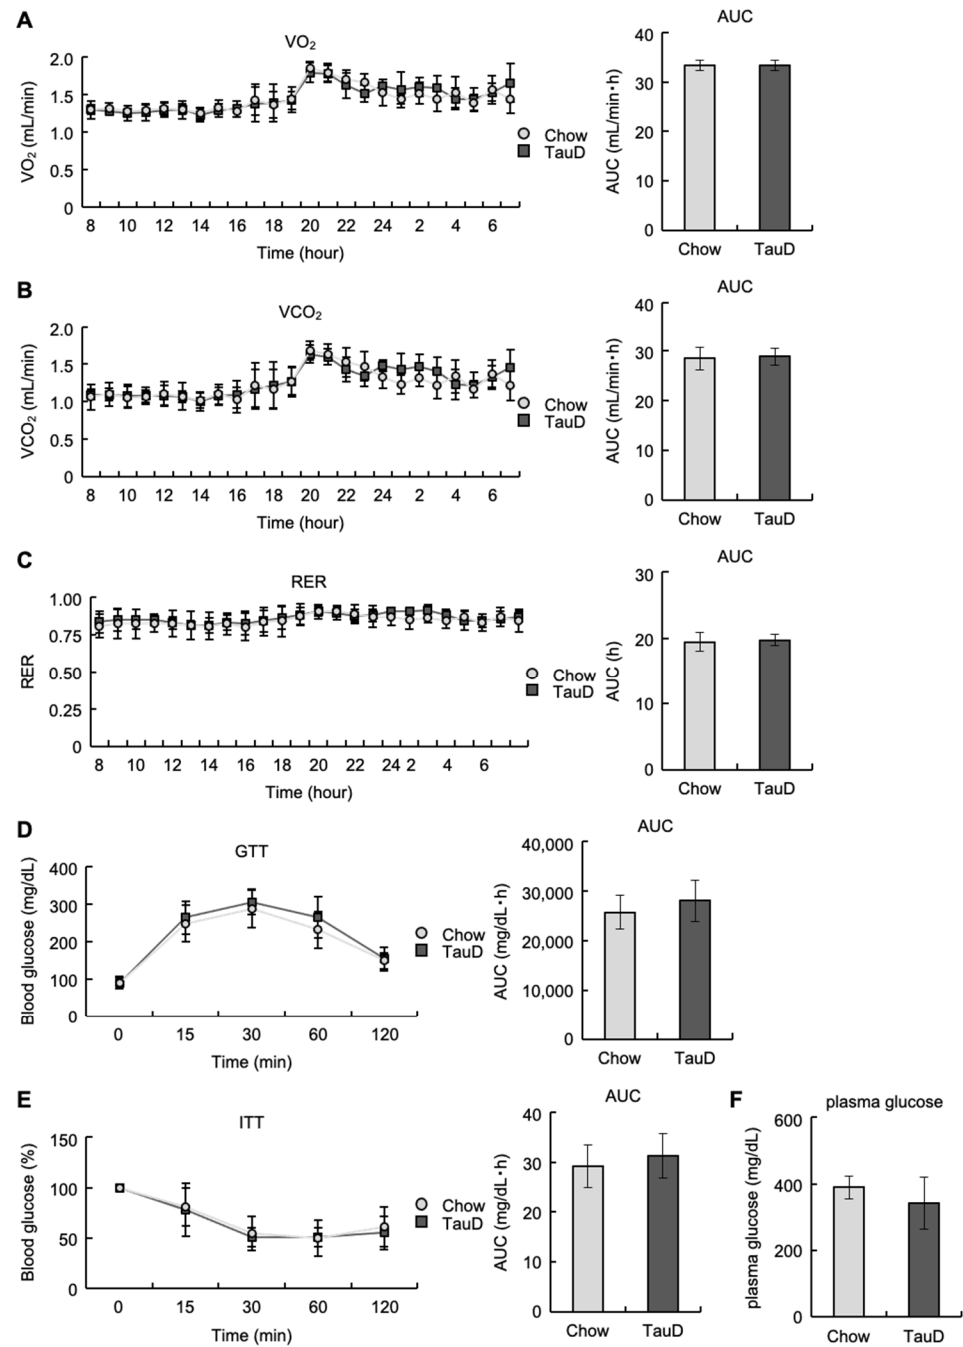

**Figure S2.** Respiratory metabolism and glucose metabolism of Chow and TauD groups. (A–C)  $VO_2$  ( $O_2$  consumption) (A),  $VCO_2$  ( $CO_2$  production) (B), and respiratory exchange ratio ( $RER = VCO_2/VO_2$ ) (C) during light and dark phases at 18 weeks of age ( $n=6$ ). (D, E) Glucose tolerance test (GTT) ( $n = 7-8$ ) (D) and insulin tolerance test (ITT) ( $n = 10$ ) at 18 weeks of age. (F) Plasma glucose levels at 20 weeks of age ( $n = 5$ ). Values represent means  $\pm$  SD.

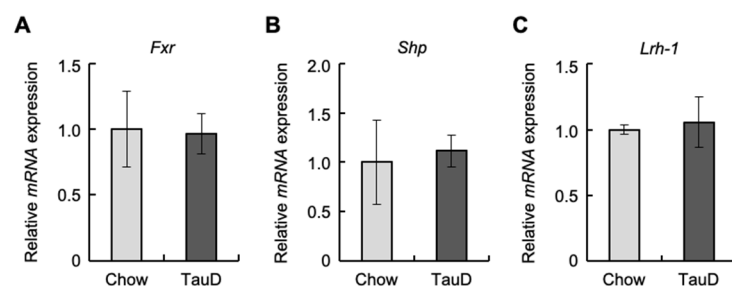

**Figure S3.** Expression of genes involved in FXR pathway in liver of Chow and TauD groups. The expression of *Fxr* (A), *Shp* (B), and *Lrh-1* mRNA (C) in liver was analyzed by real-time RT-PCR (n = 4). Data were normalized to *Tbp* levels. Values represent means  $\pm$  SD.

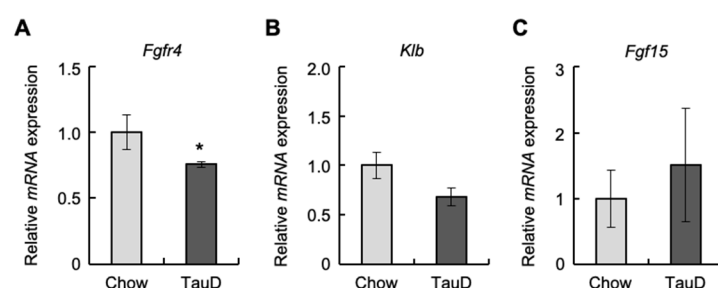

**Figure S4.** Expression of genes involved in FGFR4/KLB pathway in liver of Chow and TauD groups. The mRNA expression of *Fgfr4* (A) and *Klb* (B) in liver and *Fgf15* (C) in ileum was analyzed by real-time RT-PCR (n = 3–4). Data were normalized to *Tbp* levels. Values represent means  $\pm$  SD. Differences between values were statistically evaluated by Student's t-test. \*  $p < 0.05$  vs. Chow.

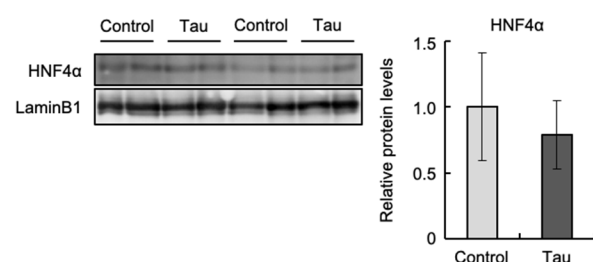

**Figure S5.** Nuclear HNF4α levels in Hepa1-6 cells. Nuclear protein extracted from 10 mM taurine-treated Hepa1-6 cells was analyzed by immunoblotting using the shown antibodies (n = 4). The left panels show the immunoblotting images. The right graphs show quantitative data. LaminB1 was used as a loading control. Values represent means  $\pm$  SD.
